# Supplementary material
Source: bioRxiv or medRxiv preprint supplement (https://www.medrxiv.org/highwire/filestream/84256/field_highwire_adjunct_files/2/2020.05.05.20092098-3.pdf)

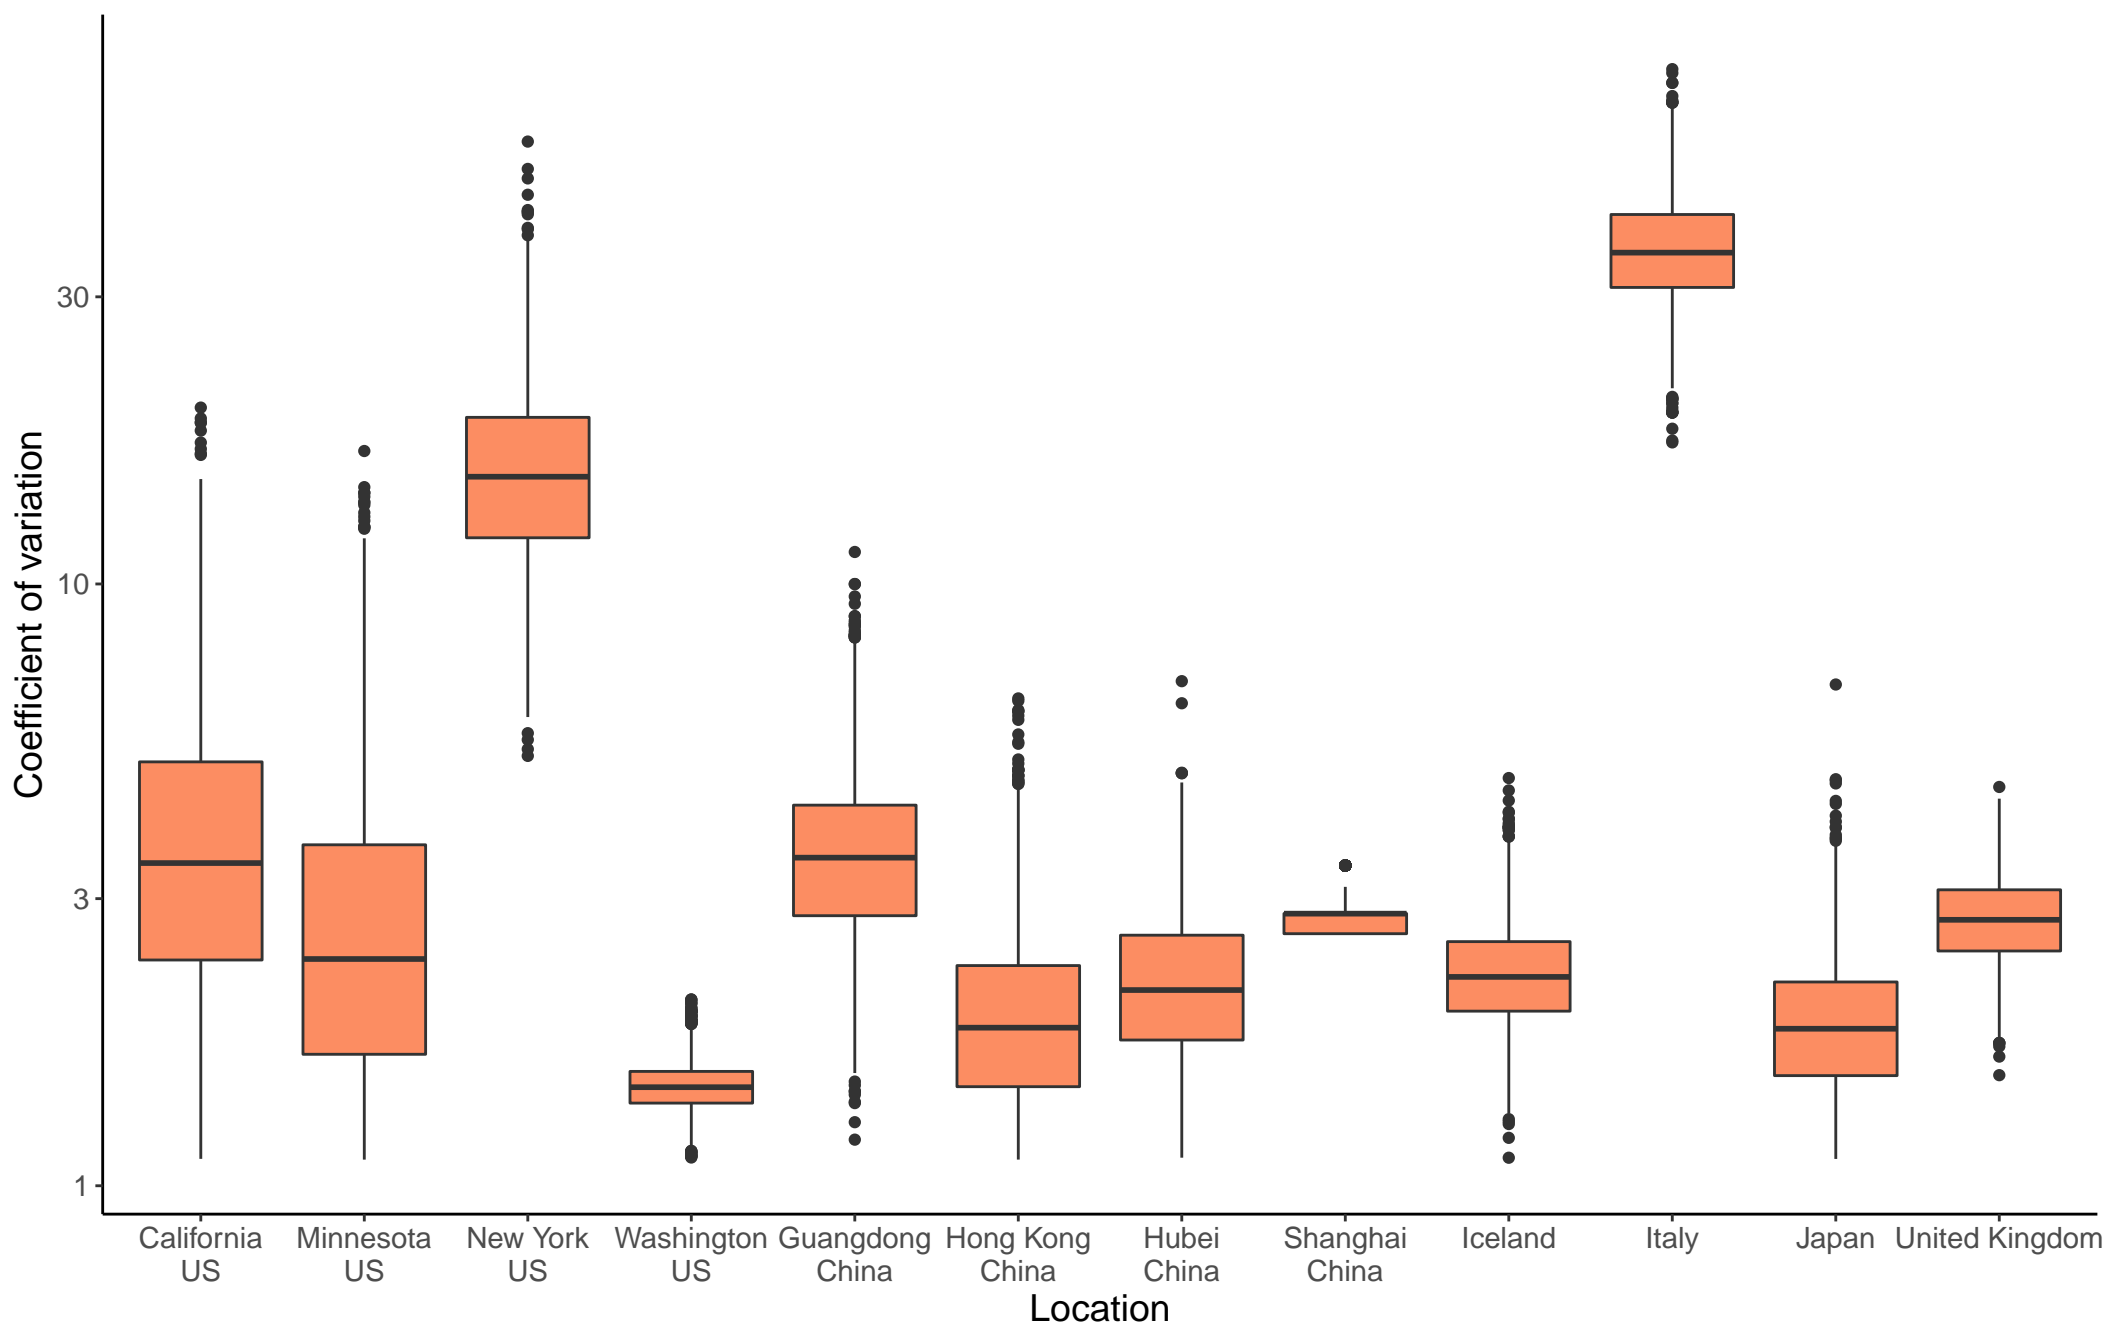

Supplement: Supplementary file [file 2020.05.05.20092098-3.pdf]
